# Supplementary material for: Improvement of a synthetic live bacterial therapeutic for phenylketonuria with biosensor-enabled enzyme engineering
Source: PubMed Central journal article supplement (PMC8553829; doi:10.1038/s41467-021-26524-0), 2021-10-28
Supplement: 41467_2021_26524_MOESM5_ESM.pdf [file 41467_2021_26524_MOESM5_ESM.pdf]

**Title:** Supplementary Data 1

**Description:** A table containing all primers used for construction of PAL library
